# Supplementary material
Source: PubMed Central journal article supplement (PMC6187209)
Supplement: IMM-155-356-s001.pdf [file IMM-155-356-s001.pdf]

## Supplementary Figure legends

Supplementary Figure S1

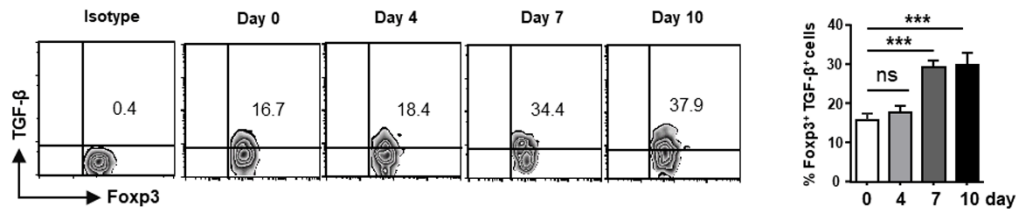

**Supplementary Figure S1. Expression of TGF-β by Treg cells from PPs in DSS-treated mice.** Flow cytometry was used to detect the TGF-β production within Fop3<sup>+</sup> T cells in PPs from WT mice on day 0, 4, 7, 10 after DSS-treatment. The data represent 3 independent experiments and are expressed as the means  $\pm$  SEM. \*\*\*P<0.001

Supplementary Figure S2

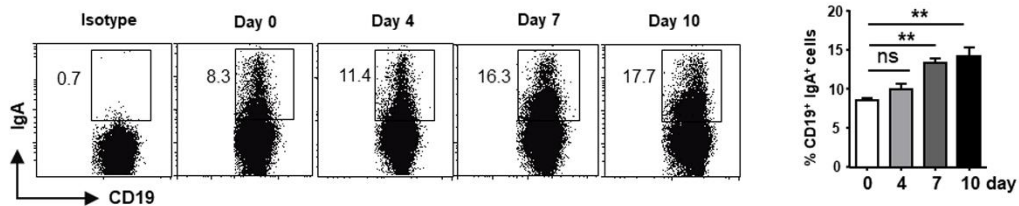

**Supplementary Figure S2. Expression of IgA on PP-derived B cells in mice with colitis.** IgA expression (surface plus intracellular staining) within the CD19<sup>+</sup> B cells in PPs from WT mice during colitis were analyzed by flow cytometry. The data represent 3 independent experiments and are expressed as the means  $\pm$  SEM. \*\*P<0.01.

### Supplementary Figure S3

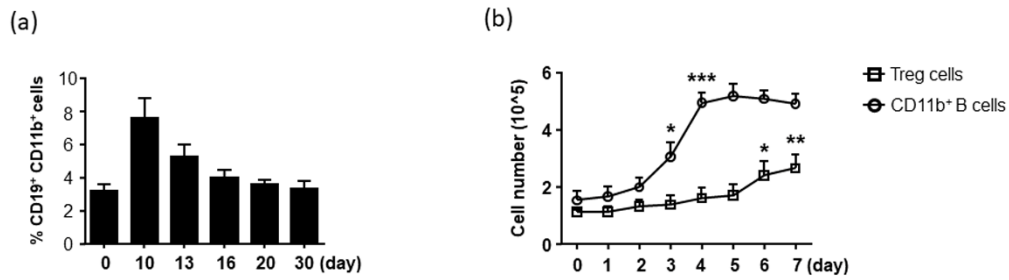

### Supplementary Figure S3. Tregs and/or CD11b<sup>+</sup> B cells populations in PPs from mice with colitis.

(a) Flow cytometry was used to detect the frequencies of PPs-derived CD11b<sup>+</sup> B cells on day 0, 10, 13, 16, 20, 30 after colitis induction. The data are pooled from two independent experiments, each with 3–4 mice. (b) The cell numbers of Tregs (Foxp3<sup>+</sup>) and CD11b<sup>+</sup> B cells in PPs from day 0 to 7 in DSS-induced mice were calculated by flow cytometry. \*P<0.05; \*\*P<0.01; \*\*\*P<0.001. Data shown are the mean ± SEM of 5 mice.

Supplementary Figure S4

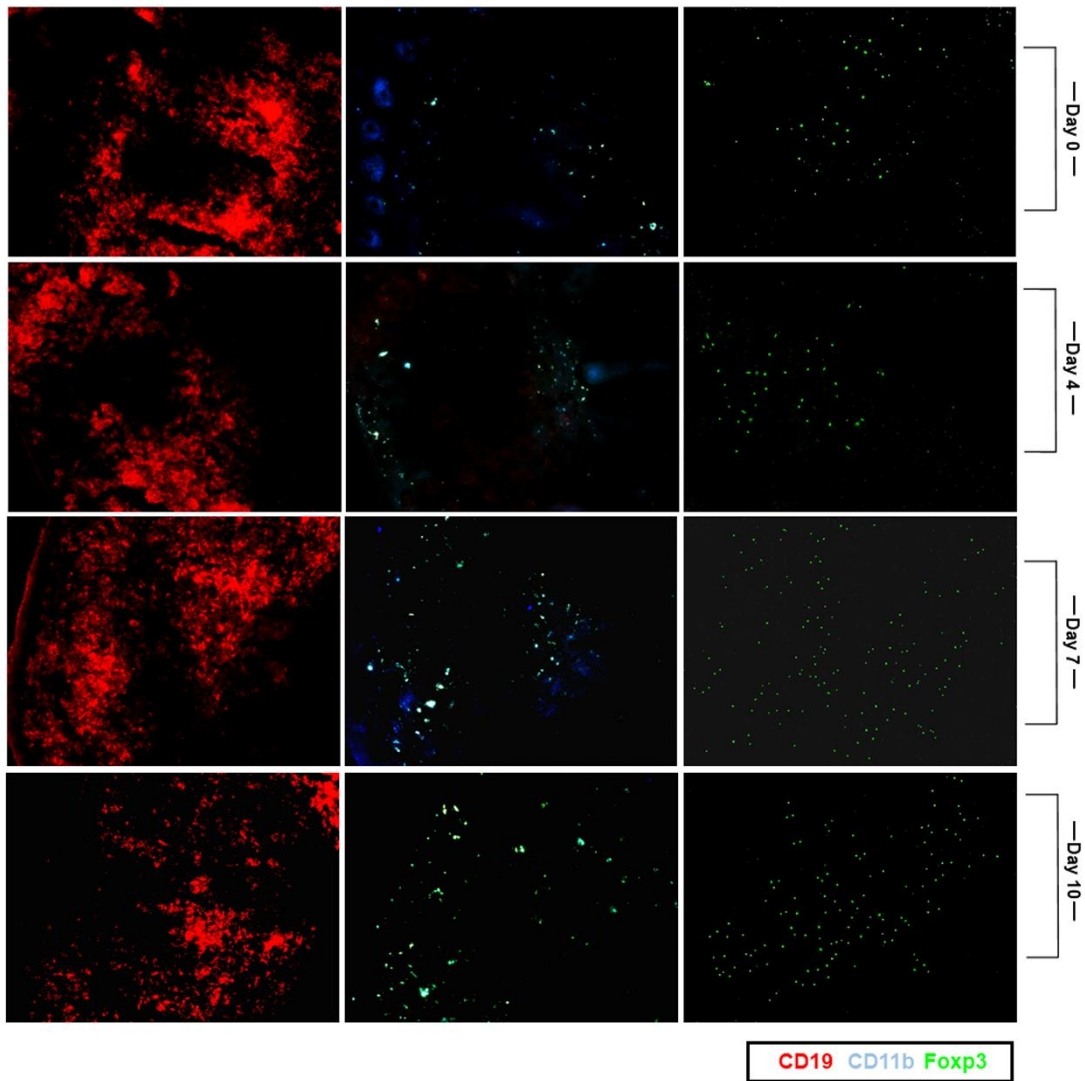

**Supplementary Figure S4. Treg cells and CD11b<sup>+</sup> B cells colocalize in PPs during DSS-induced colitis.** The distributions of CD19 (red), CD11b (cyan) and Foxp3 (green) cells in PPs of mice with colitis were detected by immunofluorescence staining.

### Supplementary Figure S5

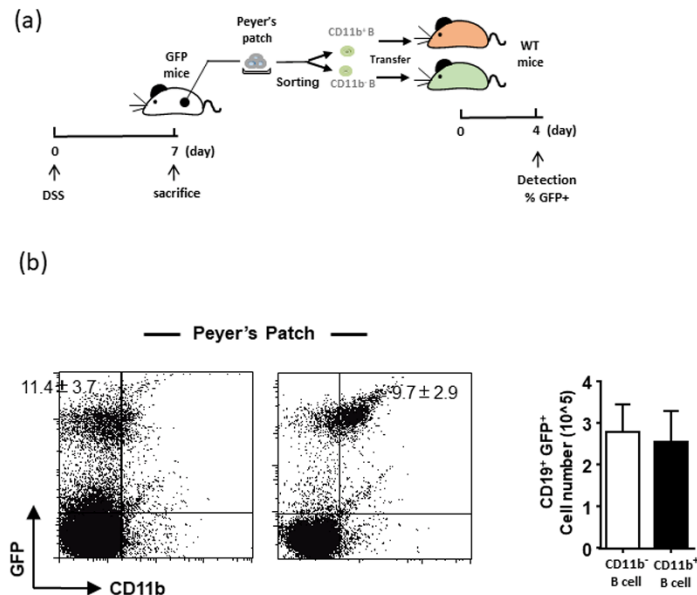

**Supplementary Figure S5. The transfer efficiency of GFP-tagged CD11b<sup>+</sup> or CD11b<sup>-</sup> B cells in recipients. (a).** PPs-derived CD11b<sup>+</sup> or CD11b<sup>-</sup> B cells were purified from GFP mice after DSS treatment for 7 days and were adoptively transferred into wide-type mice,  $5 \times 10^6$  cells per mouse. The percentages of GFP<sup>+</sup> B cells in PPs from recipients were detected on day 4 after transfer. **(b).** The percentages and cell numbers of CD11b<sup>+</sup> GFP<sup>+</sup> and CD11b<sup>-</sup> GFP<sup>+</sup> B cells in PPs from recipients were analyzed by flow cytometry. The data are shown from two independent experiments with 3 mice.
